# Supplementary material
Source: publisher figshare collection journal article supplement (https://geolsoc.figshare.com/ndownloader/files/18541976)
Supplement: Supplementary file 1 [file 18541976]

| **Sample** | **D (°)** | **I (°)** | **Fa (µT)** | **σ (µT)** | **Tmax – Tmin (°C)** | **nPI** | **f** | **g** | **q** | **MAD** |
| --- | --- | --- | --- | --- | --- | --- | --- | --- | --- | --- |
| **ILINDENTSI (EARLY NEOLITHIC – STAGE III)** | | | | | | | | | | |
| IL1 | 340.7 | 54.5 |  |  |  |  |  |  |  |  |
| IL3 | displaced |  |  |  |  |  |  |  |  |  |
| IL4v | displaced |  | 49.86 | 1.49 | 20 – 620 | 14 | 0.9 | 0.88 | 27.51 | 4 |
| IL4j |  |  | 49.14 | 1.24 | 150 – 620 | 11 | 0.8 | 0.89 | 28.31 | 2 |
| IL5 | displaced |  |  |  |  |  |  |  |  |  |
| IL6 | displaced |  |  |  |  |  |  |  |  |  |
| IL7z | displaced |  | failed |  |  |  |  |  |  |  |
| IL8d | displaced |  | 47.10 | 3.83 | 150 – 580 | 10 | 0.8 | 0.83 | 7.86 | 5 |
| IL9b | displaced |  | 52.85 | 1.94 | 150 – 580 | 11 | 0.8 | 0.86 | 18.90 | 5 |
| IL10z | 339.1 | 61.4 | 50.24 | 2.07 | 150 – 460 | 7 | 0.5 | 0.78 | 9.44 | 3 |
| IL11j | 343.2 | 63.3 | 50.97 | 2.53 | 150 – 460 | 8 | 0.5 | 0.84 | 8.50 | 5 |
| IL12v | 352.4 | 63.9 | 49.01 | 0.84 | 200 – 580 | 10 | 0.8 | 0.82 | 38.96 | 2 |
| IL13b | 344.2 | 56.4 | 51.84 | 1.92 | 20 – 580 | 13 | 0.9 | 0.90 | 22.62 | 3 |
| IL14 | 339.8 | 62.9 |  |  |  |  |  |  |  |  |
| IL15g | 351.9 | 58.5 | 49.47 | 2.51 | 150 – 520 | 9 | 0.5 | 0.51 | 8.56 | 3 |
| **Mean** | **344.7** | **59.8** | **49.77** | **1.23** | **α95 = 3.1** | **K = 330** |  |  |  |  |
| **SITE 15, MURSALEVO** | | | | | | | | | | |
| HOUSEHOLD OVEN, building level I (EARLY NEOLITHIC – STAGE III) | | | | | | | | | | |
| Mo2a | 0.8 | 61.5 | 55.21 | 3.55 | 20 – 460 | 11 | 0.6 | 0.88 | 8.06 | 2 |
| Mo2v |  |  | 51.44 | 3.52 | 20 – 460 | 11 | 0.6 | 0.89 | 8.20 | 3 |
| Mo3b | 348.3 | 52.4 | 56.10 | 3.90 | 20 – 460 | 11 | 0.6 | 0.89 | 7.40 | 2 |
| Mo4b | 356.2 | 55.4 | 53.27 | 2.82 | 20 – 460 | 11 | 0.6 | 0.89 | 10.3 | 2 |
| Mo4g | 358.7 | 57.2 | 58.30 | 3.43 | 20 – 460 | 11 | 0.6 | 0.89 | 9.17 | 2 |
| Mo5g | 354.4 | 57.5 | 56.32 | 4.30 | 20 – 460 | 11 | 0.6 | 0.89 | 6.89 | 2 |
| **Mean** | **355.4** | **56.8** | **54.87** | **2.25** | **α95 = 4.0** | **K = 365** |  |  |  |  |
| BURNT REMAINS OF DWELLING 9 in Sq. H17, building level II (EARLY NEOLITHIC – STAGE III) | | | | | | | | | | |
| Mo31g | 17.1 | 57.2 | 49.10 | 2.75 | 20 – 460 | 10 | 0.7 | 0.88 | 11.6 | 4 |
| Mo32 | 22.7 | 57.9 |  |  |  |  |  |  |  |  |
| Mo33g | 12.3 | 56.7 | 52.49 | 1.22 | 20 – 400 | 9 | 0.6 | 0.86 | 21.3 | 2 |
| Mo34 | 19.5 | 58.9 | failed |  |  |  |  |  |  |  |
| Mo35 | displaced |  |  |  |  |  |  |  |  |  |
| Mo36 | displaced |  |  |  |  |  |  |  |  |  |
| BURNT REMAINS OF A DWELLING in Sq. L14 (EARLY NEOLITHIC – STAGE III) | | | | | | | | | | |
| Mo37 | 5.2 | 69.7 | failed |  |  |  |  |  |  |  |
| Mo38v | 354.5 | 64.3 | 53.40 | 3.15 | 20 – 460 | 10 | 0.6 | 0.86 | 8.78 | 3 |
| Mo39e | 5.2 | 64.7 | 51.20 | 2.19 | 20 – 460 | 10 | 0.7 | 0.88 | 14.47 | 3 |
| Mo40 | 5.5 | 62.3 |  |  |  |  |  |  |  |  |
| Mo41a | 356.9 | 68.3 | 50.22 | 1.00 | 20 – 3 0 | 8 | 0.6 | 0.83 | 27.06 | 2 |
| Mo42 | 13.8 | 46.4 |  |  |  |  |  |  |  |  |
| Mo43a | 5.7 | 66.4 | failed |  |  |  |  |  |  |  |
| Mo44 | 352.4 | 63.2 |  |  |  |  |  |  |  |  |
| Mo45 | 20.9 | 60.5 |  |  |  |  |  |  |  |  |
| Mo46 | 22.5 | 64.5 |  |  |  |  |  |  |  |  |
| Mo47e | 8.2 | 59.1 | 51.55 | 1.13 | 20 – 580 | 13 | 0.9 | 0.90 | 38.93 | 2 |
| Mo48a | 15.5 | 57.0 | failed |  |  |  |  |  |  |  |
| **Mean** | **8** | **61.2** | **51.24** | **1.06** | **α95 = 3.0** | **K = 156** |  |  |  |  |
| BURNT REMAINS OF DWELLING 17 in Sq. J8/I8 (LATE NEOLITHIC – SECOND HALF) | | | | | | | | | | |
| Mo6v | 7.4 | 70.5 | 35.28 | 1.49 | 20 – 460 | 11 | 0.7 | 0.89 | 14.70 | 2 |
| Mo7g | 6.4 | 70.5 | 40.01 | 1.67 | 20 – 460 | 11 | 0.7 | 0.89 | 14.60 | 2 |
| Mo9 | 5.7 | 53.0 |  |  |  |  |  |  |  |  |
| Mo10v | 1.5 | 59.5 | 38.13 | 1.04 | 20 – 580 | 13 | 1.0 | 0.87 | 31.10 | 2 |
| Mo11a | 5.3 | 54.5 | 36.81 | 0.84 | 150 – 580 | 11 | 0.9 | 0.82 | 33.15 | 2 |
| Mo12 | 13.8 | 54.7 |  |  |  |  |  |  |  |  |
| Mo13 | 11.9 | 56.9 |  |  |  |  |  |  |  |  |
| Mo14 | 12.9 | 53.7 |  |  |  |  |  |  |  |  |
| Mo15e | 3.9 | 65.1 | 38.30 | 1.56 | 20 – 460 | 11 | 0.7 | 0.89 | 14.90 | 2 |
| Mo16 | 8.8 | 57.8 |  |  |  |  |  |  |  |  |
| BURNT REMAINS OF DWELLING 13 in Sq. H7 (LATE NEOLITHIC – SECOND HALF) | | | | | | | | | | |
| Mo17 | displaced |  |  |  |  |  |  |  |  |  |
| Mo18 | displaced |  |  |  |  |  |  |  |  |  |
| Mo19d | 357.7 | 59.4 | 34.36 | 1.90 | 20 – 430 | 9 | 0.7 | 0.84 | 11 | 3 |
| Mo20a | 14.0 | 61.4 | 40.29 | 2.27 | 20 – 430 | 10 | 0.5 | 0.87 | 8 | 2 |
| Mo21 | 2.3 | 48.8 |  |  |  |  |  |  |  |  |
| Mo22 | displaced |  |  |  |  |  |  |  |  |  |
| Mo23a | 18.2 | 73.9 | 37.26 | 1.18 | 150 – 580 | 11 | 0.9 | 0.88 | 24.68 | 2 |
| Mo24b | 358.6 | 64.9 | 40.80 | 1.16 | 20 – 580 | 13 | 0.9 | 0.90 | 29.8 | 2 |
| Mo25 | 12.5 | 61.6 |  |  |  |  |  |  |  |  |
| Mo26 | Displaced |  |  |  |  |  |  |  |  |  |
| Mo27 | 353.8 | 50.3 |  |  |  |  |  |  |  |  |
| Mo28 | 3.6 | 73.1 |  |  |  |  |  |  |  |  |
| Mo29a | 358.4 | 64.1 | 38.59 | 1.71 | 20 – 460 | 11 | 0.6 | 0.89 | 12.8 | 1 |
| Mo30 | 359.2 | 62.9 |  |  |  |  |  |  |  |  |
| **Mean** | **5.6** | **61** | **37.87** | **1.74** | **α95 = 3.3** | **K = 101** |  |  |  |  |
| **SITE 14, MURSALEVO** | | | | | | | | | | |
| BURNT REMAINS OF STRUCTRE 19 (LATE NEOLITHIC – FIRST HALF) | | | | | | | | | | |
| Mr15 | 351.0 | 54.8 |  |  |  |  |  |  |  |  |
| Mr16 | 2.0 | 43.8 |  |  |  |  |  |  |  |  |
| Mr17 | 1.7 | 42.4 |  |  |  |  |  |  |  |  |
| Mr18 | 357.6 | 45.6 |  |  |  |  |  |  |  |  |
| Mr19a | 355.9 | 42.4 | 33.80 | 1.08 | 0 – 400 | 9 | 0.9 | 0.75 | 21.93 | 3 |
| Mr19d |  |  | 26.57 | 3.03 | 240 – 400 | 5 | 0.6 | 0.66 | 3.71 | 1 |
| Mr20 | 350.4 | 45.6 |  |  |  |  |  |  |  |  |
| Mr21 | 354.3 | 44.4 |  |  |  |  |  |  |  |  |
| Mr22 | 354.1 | 45.8 |  |  |  |  |  |  |  |  |
| Mr23a | 350.7 | 47.6 | failed |  |  |  |  |  |  |  |
| Mr25 | 344.1 | 37.6 |  |  |  |  |  |  |  |  |
| Mr26 | 350.1 | 46.2 |  |  |  |  |  |  |  |  |
| Mr27 | 359.3 | 61.0 |  |  |  |  |  |  |  |  |
| Mr28v | 356.3 | 59.8 | 28.65 | 1.40 | 0 – 460 | 11 | 0.8 | 0.82 | 12.88 | 3 |
| Mr29 | 355.4 | 54.0 |  |  |  |  |  |  |  |  |
| Mr30a |  |  | 29.94 | 2.55 | 0 – 430 | 10 | 0.7 | 0.75 | 6.00 | 2 |
| Mr30z | 356.1 | 52.6 | 27.44 | 1.23 | 0 – 430 | 10 | 0.9 | 0.80 | 15.25 | 5 |
| Mr31a | 0.4 | 56.0 | 31.50 | 1.74 | 0 – 400 |  |  |  |  |  |
| Mr31v |  |  | 33.37 | 3.11 | 0 – 460 | 11 | 0.6 | 0.78 | 4.84 | 2 |
| Mr32 | 358.4 | 54.4 |  |  |  |  |  |  |  |  |
| Mr33 | 16.2 | 54.7 |  |  |  |  |  |  |  |  |
| **Mean** | **356.0** | **59.6** | **30.49** | **2.72** | **α95 = 3.4** | **K = 104** |  |  |  |  |
| **SITE 16, SHARKOV CHIFLIK (LATE NEOLITHIC – FIRST HALF)** | | | | | | | | | | |
| BURNT REMAINS OF STRUCTRE 25 in Sq. N24/N25 | | | | | | | | | | |
| Sh1 | 19.1 | 64.0 |  |  |  |  |  |  |  |  |
| Sh2 | 16.9 | 57.8 |  |  |  |  |  |  |  |  |
| Sh3 | 30.2 | 63.8 |  |  |  |  |  |  |  |  |
| Sh4 | 12.0 | 67.4 |  |  |  |  |  |  |  |  |
| Sh5 | 10.4 | 63.2 |  |  |  |  |  |  |  |  |
| Sh6v | 10.2 | 60.0 | 44.04 | 0.65 | 0 – 520 | 12 | 0.9 | 0.90 | 55.60 | 5 |
| Sh6j |  |  | 42.87 | 0.96 | 0 – 580 | 13 | 0.9 | 0.86 | 37.24 | 3 |
| Sh7a | 8.8 | 61.0 | 38.85 | 1.24 | 0 – 580 | 12 | 1.0 | 0.90 | 27.02 | 4 |
| Sh8 | 23.4 | 62.4 |  |  |  |  |  |  |  |  |
| Sh9 | 14.6 | 56.4 |  |  |  |  |  |  |  |  |
| Sh11 | 345.9 | 70.8 |  |  |  |  |  |  |  |  |
| Sh12 | 5.0 | 67.9 |  |  |  |  |  |  |  |  |
| Sh13 | displaced |  |  |  |  |  |  |  |  |  |
| Sh14 | displaced |  |  |  |  |  |  |  |  |  |
| BURNT REMAINS OF STRUCTRE 26 in Sq. K23/J24 | | | | | | | | | | |
| Sh16 | 8.8 | 57.8 |  |  |  |  |  |  |  |  |
| Sh17 | 5.6 | 59.9 |  |  |  |  |  |  |  |  |
| Sh18g | 348.1 | 61.7 | 38.99 | 0.78 | 0 – 520 | 11 | 0.9 | 0.86 | 40.12 | 5 |
| Sh19 | 352.8 | 57.0 |  |  |  |  |  |  |  |  |
| Sh20 | 3.8 | 48.8 |  |  |  |  |  |  |  |  |
| Sh21 | no result | no result |  |  |  |  |  |  |  |  |
| Sh22a | 348.1 | 66.5 | 42.54 | 1.14 | 0 – 520 | 12 | 1.0 | 0.87 | 30.78 | 5 |
| Sh23 | 13.5 | 62.4 |  |  |  |  |  |  |  |  |
| Sh24a | 12.8 | 52.7 | 40.91 | 0.86 | 0 – 520 | 11 | 0.9 | 0.87 | 35.70 | 3 |
| Sh24g |  |  | 39.36 | 0.60 | 0 – 520 | 12 | 1.0 | 0.90 | 57.01 | 5 |
| Sh25 | 5.1 | 53.4 |  |  |  |  |  |  |  |  |
| **Mean** | **8.1** | **61.2** | **41.1** | **2.05** | **α95 = 3.1** | **K = 111** |  |  |  |  |
| **CHAVDAROVA CHESHMA (LATE NEOLITHIC – FIRST HALF)** | | | | | | | | | | |
| BURNT DWELLING WALL in Sq. I28 | | | | | | | | | | |
| ChSh1 | 345.6 | 65.3 |  |  |  |  |  |  |  |  |
| ChSh2e | 352.3 | 62.2 | 39.36 | 1.45 | 0 – 460 |  |  |  |  | 5 |
| ChSh3 | 347.9 | 61.3 |  |  |  | 11 | 0.7 | 0.88 | 17.01 |  |
| ChSh4 | 350.3 | 49.1 |  |  |  |  |  |  |  |  |
| ChSh5a | 340.4 | 49.7 | 40.30 | 0.99 | 0 – 520 | 12 | 0.8 | 0.83 | 25.36 | 4 |
| ChSh6 | 335.7 | 61.0 |  |  |  |  |  |  |  |  |
| ChSh7 | no result | no result |  |  |  |  |  |  |  |  |
| ChSh8a | 341.8 | 66.0 | 39.74 | 1.65 | 0 – 460 | 11 | 0.8 | 0.89 | 16.06 | 5 |
| BURNT DWELLING WALL in Sq. H28 | | | | | | | | | | |
| ChSh20 | 4.2 | 60.2 |  |  |  |  |  |  |  |  |
| ChSh21 | 22.1 | 62.0 |  |  |  |  |  |  |  |  |
| ChSh22 | 11.1 | 54.3 |  |  |  |  |  |  |  |  |
| ChSh23 | 12.8 | 53.3 |  |  |  |  |  |  |  |  |
| ChSh24 | 7.8 | 53.2 |  |  |  |  |  |  |  |  |
| ChSh25 | 14.2 | 57.5 |  |  |  |  |  |  |  |  |
| ChSh26 | 10.8 | 58.2 |  |  |  |  |  |  |  |  |
| ChSh27 | 8.1 | 58.0 |  |  |  |  |  |  |  |  |
| ChSh28 | 352.3 | 57.4 |  |  |  |  |  |  |  |  |
| ChSh29a | 351.5 | 55.0 | 40.88 | 1.27 | 0 – 460 | 11 | 0.5 | 0.86 | 14.72 | 5 |
| ChSh30 | 11.6 | 58.2 |  |  |  |  |  |  |  |  |
| ChSh31 | no result | no result |  |  |  |  |  |  |  |  |
| ChSh32 | 349.5 | 59.0 |  |  |  |  |  |  |  |  |
| **Mean** | **358.7** | **58.6** | **40.18** | **0.53** | **α95 = 3.5** | **K = 90** |  |  |  |  |
| HOUSEHOLD OVEN in Sq. I28 | | | | | | | | | | |
| ChSh9a | 5.1 | 51.7 | 34.66 | 1.16 | 0 – 460 | 11 | 0.4 | 0.87 | 8.22 | 3 |
| ChSh10 | 353.3 | 56.9 |  |  |  |  |  |  |  |  |
| ChSh11 | 2.8 | 52.6 |  |  |  |  |  |  |  |  |
| ChSh12 | 7.9 | 52.1 |  |  |  |  |  |  |  |  |
| ChSh13 | 352.5 | 51.0 |  |  |  |  |  |  |  |  |
| ChSh14 | 5.5 | 52.8 |  |  |  |  |  |  |  |  |
| ChSh15g | 3.5 | 51.8 | 36.90 | 1.46 | 0 – 460 | 11 | 0.4 | 0.86 | 6.32 | 3 |
| ChSh16j | 4.4 | 52.7 | 32.63 | 1.42 | 0 – 460 | 11 | 0.4 | 0.84 | 5.35 | 5 |
| ChSh17 | 3.6 | 57.1 |  |  |  |  |  |  |  |  |
| ChSh19 | 7.4 | 53.6 |  |  |  |  |  |  |  |  |
| **Mean** | **2.7** | **53.3** | **34.69** | **1.6** | **α95 = 2.3** | **K = 447** |  |  |  |  |
| DWELLING FLOOR 6 in Sq. F10/F11, context 10-91 – NO RESULTS | | | | | | | | | | |
| DWELLING FLOOR 3 in Sq. F10/F11, context 10-91 - NO RESULTS | | | | | | | | | | |
| DWELLING FLOOR 3 in Sq. F10/F11, context 10-90 | | | |  |  |  |  |  |  |  |
| ChSh62v | no result | no result | 28.84 | 0.95 | 20 – 430 | 10 | 0.7 | 0.87 | 19.30 | 3 |
| ChSh62d |  |  | 27.32 | 2.95 | 20 – 240 | 5 | 0.5 | 0.74 | 3.54 | 5 |
| DWELLING FLOOR 1 in Sq. F10/F11, context 10-90 - NO RESULTS | | | | | | | | | | |
| DWELLING FLOOR - 2B | |  |  |  |  |  |  |  |  |  |
| ChSh72d | no result | no result | 32.18 | 3.80 | 20 – 280 | 5 | 0.5 | 0.71 | 2.84 | 3 |
| ChSh72v |  |  | 34.70 | 2.95 | 20 – 240 | 5 | 0.5 | 0.71 | 2.84 | 3 |
| ChSh73b | no result | no result | failed |  |  |  |  |  |  |  |
| DWELLING FLOOR 1 in Sq. F10, context 10-88 - NO RESULTS | | | | | | | | | | |
| **Mean** |  |  | **29.42** | **1.77** |  |  |  |  |  |  |
| HOUSEHOLD OVEN, context 14-141 | | | | | | | | | | |
| ChSh59 | 7.2 | 51.9 |  |  |  |  |  |  |  |  |
| ChSh65z | 17.8 | 56.9 | failed |  |  |  |  |  |  |  |
| ChSh66g | 12.0 | 63.0 | failed |  |  |  |  |  |  |  |
| ChSh66d |  |  | failed |  |  |  |  |  |  |  |
| ChSh67v | 16.1 | 60.1 | failed |  |  |  |  |  |  |  |
| ChSh67e |  |  | failed |  |  |  |  |  |  |  |
| **Mean** | **13.1** | **58.0** |  |  | **α95 = 6.2** | **К = 222** |  |  |  |  |
| **BURNT OVEN, context 16-36** | | | | | | | | | | |
| UPPER LEVEL | | | | | | | | | | |
| ChSh81а | 359.7 | 54.9 | 29.71 | 4.82 | 200 – 460 | 8 | 0.5 | 0.85 | 2.80 | 3 |
| ChSh82 | 10.6 | 59.8 |  |  |  |  |  |  |  |  |
| ChSh83 | 15.0 | 55.1 | failed |  |  |  |  |  |  |  |
| ChSh84b | 4.9 | 59.2 | 29.71 | 2.46 | 20 – 520 | 13 | 0.9 | 0.86 | 9.81 | 3 |
| ChSh85b | 2.5 | 61.4 | 27.83 | 1.49 | 20 – 580 | 13 | 0.9 | 0.88 | 15.02 | 5 |
| ChSh87 | 355.2 | 62.6 |  |  |  |  |  |  |  |  |
| ChSh90a | 359.7 | 63.8 | 28.17 | 2.89 | 20 – 580 | 13 | 1.0 | 0.88 | 8.55 | 2 |
| MIDDLE LEVEL |  |  |  |  |  |  |  |  |  |  |
| ChSh91 | 12.6 | 52.2 |  |  |  |  |  |  |  |  |
| ChSh92e | 10.7 | 56.0 | 28.32 | 2.50 | 20 – 580 | 13 | 0.9 | 0.86 | 9.11 | 2 |
| ChSh93b | 10.8 | 55.5 | 31.95 | 2.18 | 20 – 580 | 13 | 0.9 | 0.84 | 10.44 | 2 |
| ChSh94a | 10.6 | 56.6 | 27.97 | 1.31 | 240 – 580 | 9 | 0.9 | 0.82 | 14.90 | 3 |
| ChSh94b |  |  | 31.18 | 1.35 | 150 – 580 | 11 | 0.9 | 0.87 | 18.59 | 2 |
| ChSh95v | 3.5 | 55.5 | 28.38 | 1.57 | 20 – 580 | 13 | 0.9 | 0.87 | 14.81 | 2 |
| LOWER LEVEL |  |  |  |  |  |  |  |  |  |  |
| ChSh86 | 12.2 | 52.6 |  |  |  |  |  |  |  |  |
| ChSh88e | 13.9 | 57.9 | 27.74 | 1.90 | 20-580 | 13 | 1 | 0.88 | 12.6 | 3 |
| ChSh89a | 0.5 | 52.2 | 33.33 | 1.38 | 20-580 | 13 | 0.9 | 0.88 | 20.08 | 3 |
| ChSh96a | 8 | 56.8 | 29.91 | 1.82 | 20-580 | 13 | 0.9 | 0.87 | 13.10 | 2 |
| ChSh97a | 12.7 | 55.4 | 27.94 | 2.32 | 20-580 | 13 | 0.8 | 0.85 | 8.53 | 3 |
| ChSh98g | 8.7 | 56.8 | 29.27 | 1.79 | 20-580 | 13 | 0.9 | 0.88 | 12.92 | 3 |
| **Mean** | **7.6** | **57.0** | **29.57** | **1.90** | **α95 = 2.0** | **К = 310** |  |  |  |  |

**Table S1.** Summarized archaeomagnetic determinations of the studied collections. D – magnetic declination after sun compass correction; I – magnetic declination; Fa – archaeointensity value obtained with the corresponding standard deviation (σ) in a temperature interval Tmin – Tmax using NPI points; NRM fraction (f); gap factor (g); quality factor (q); maximum angle of deviation (MAD) are also given. In the sample name, the small letters indicate the specimens used for AI determination whereas each sample direction is calculated as an average of two or three specimen directions after the corresponding cleaning (thermal or AF). Specimens treated in Rennes laboratory are marked in grey.
